# Supplementary material for: Clinical Characteristics and Prognosis of Ovarian Clear Cell Carcinoma: a Retrospective Study of 112 Patients in Beijing
Source: Research Square preprint supplement (doi:10.21203/rs.3.rs-132769/v1), 2020-12-23
Supplement: Supplementary file 1 [file 26438f71113d6fbd6e90719b.docx]

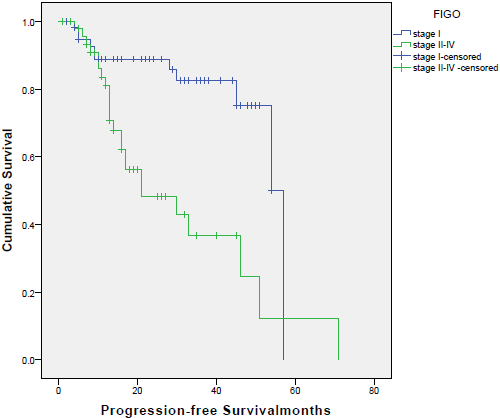


Figure 1


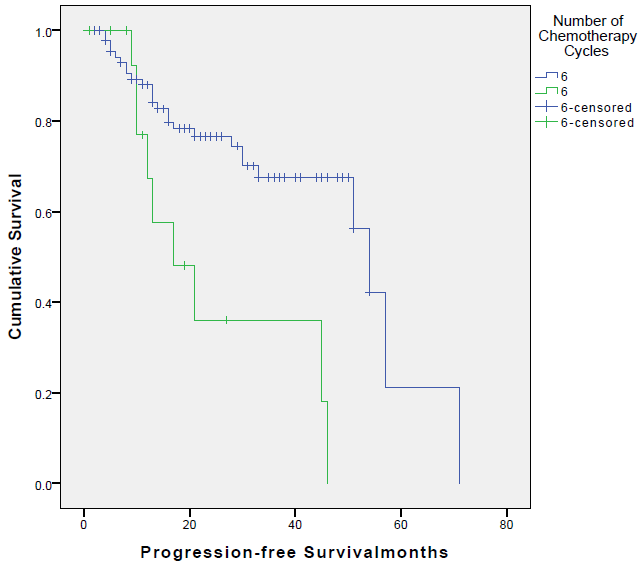


Figure 2

**
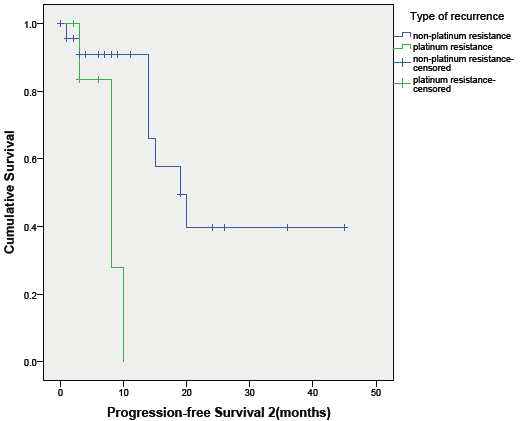
**Figure 3

Table 4 Survival analyses of PFS1 for stage I and stage III disease

| **Parameter** | **Stage I** | | **Stage III** | |
| --- | --- | --- | --- | --- |
| **HR** | **P-value** | **HR** | **P-value** |
| chemotherapy cycles of CA-125 normalization (>1 vs ≤1) | 2.26 (0.45, 11.27) | 0.319***** | 1.03 (0.27, 3.89) | 0.965* |

* Multivariate Cox regression adjusted for age; HR: hazard ratio

Table 5 Survival analysis of PFS2

| **Parameter** | **HR (95% CI)** | **P-value** |
| --- | --- | --- |
| Recurrence type (platinum resistance vs platinum sensitive) | 11.562 (1.873, 71.353) | 0.0080* |

* Multivariate Cox regression adjusted for FIGO stage and age; HR: hazard ratio
